# Supplementary material for: Curcumin inhibits liquid–liquid phase separation of fused in sarcoma and attenuates the sequestration of pyruvate kinase to restore cellular metabolism
Source: Royal Society of Chemistry journal article supplement (doi:10.1039/d2fo03224d), 2023-01-01
Supplement: d2fo03224d1.pdf [file d2fo03224d1.pdf]

## Supporting Information

### Curcumin inhibits liquid–liquid phase separation of fused in sarcoma and attenuates the sequestration of pyruvate kinase to restore cellular metabolism

Wen-Pu Shi,<sup>+a</sup> Wen-Juan Lin,<sup>+a</sup> Wan-Yi Ge,<sup>a</sup> Liang-Liang Chen,<sup>a</sup> Tuo-Di Zhang,<sup>ab</sup> Wei-Hong Guo,<sup>a</sup> Jian-Li Liu,<sup>\*c</sup>, and Da-Chuan Yin,<sup>\*a</sup>

<sup>a</sup>Key Laboratory for Space Bioscience and Biotechnology, School of Life Sciences, Northwestern Polytechnical University, 127 Youyi West Road, Xi'an 710072, Shaanxi, PR China

<sup>b</sup>Research Center of Clinical Medicine, Affiliated Hospital of Nantong University, Nantong 226001, Jiangsu, PR China

<sup>c</sup>School of Medicine, Xi'an Peihua University, 888 Changning Street, Xi'an 710125, Shaanxi, PR China

<sup>+</sup>These authors contributed equally to this work.

**\*Corresponding author at:** School of Medicine, Xi'an Peihua University, China. E-mail address: 000278@peihua.edu.cn (Jian-Li Liu);

School of Life Sciences, Northwestern Polytechnical University, China. E-mail address: yindc@nwpu.edu.cn (Da-Chuan Yin).

**E-mail address:** shiwenpu@mail.nwpu.edu.cn (Wen-Pu Shi); linwenjuan2019@nwpu.edu.cn (Wen-Juan Lin); 2021204207@mail.nwpu.edu.cn (Wan-Yi Ge); chenliangliang@mail.nwpu.edu.cn (Liang-Liang Chen); ztd2016100667@mail.nwpu.edu.cn (Tuo-Di Zhang); gwh@nwpu.edu.cn (Wei-Hong Guo); 000278@peihua.edu.cn (Jian-Li Liu); yindc@nwpu.edu.cn (Da-Chuan Yin).

**The file includes:**

Supplementary methods.

Fig S1. CCK-8 assay of 293T-FUS treated with different concentration of curcumin.

Fig S2. Curcumin docked on FUS LC.

Fig S3. Cellular thermal shift assay results with curcumin treatment.

Fig S4. Increased ATP in CUR group.

Fig S5. Pathway enrichment of Sorbitol and NC group.

Fig S6. PCA-2D score plot of Sorbitol and si-PK group.

Table S1 The percentage of protein secondary structure.

Table S2 Binding constant ( $K_b$ ), stoichiometric number ( $N$ ), entropy ( $\Delta S$ ), and enthalpy ( $\Delta H$ ) parameters for the interaction of curcumin with FUS.

Supplementary methods.

**CCK-8.**

10<sup>4</sup> cells/well were seeded in 96-well plates and incubated with different concentrations (0, 2.5, 5, 10, 20  $\mu$ M) of curcumin for 24 hours. Then 10  $\mu$ L of the CCK8 (Elabscience, E-CK-A362) was added to each well. The absorbance of each well was evaluated at a wavelength of 450 nm after incubation of one hour.

**Cellular thermal shift assay.**

293T-FUS were incubated with 10  $\mu$ M curcumin and a same volume of vehicle DMSO and resuspend with PBS. The cell suspension mixtures were divided into 8 parts and then heated at a temperature gradient of 49, 52, 55, 58, 61, 64, 67, and 70  $^{\circ}$ C for 3min respectively. After heated the cell lysate were obtained by repeating freeze-thawed, and target proteins were detected by western blot.

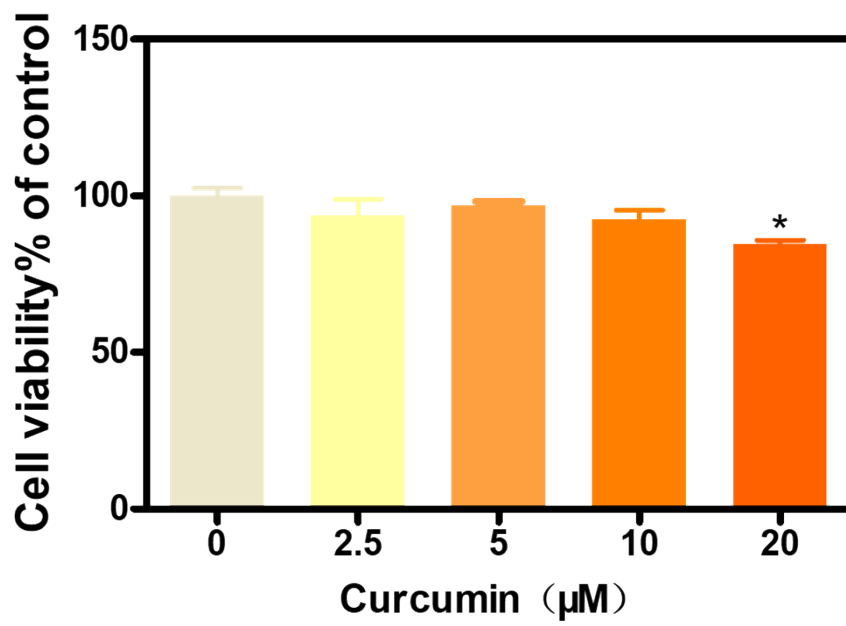

Fig S1. CCK-8 assay of 293T-FUS treated with different concentration of curcumin. The values were illustrated as the mean  $\pm$  SD. \*  $P < 0.05$ .

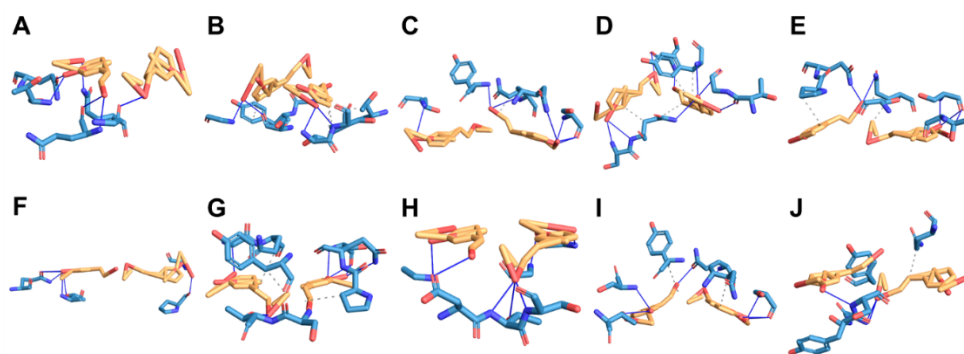

Fig S2. Curcumin docked on FUS LC. FUS LC: fused in sarcoma low-complexity domain

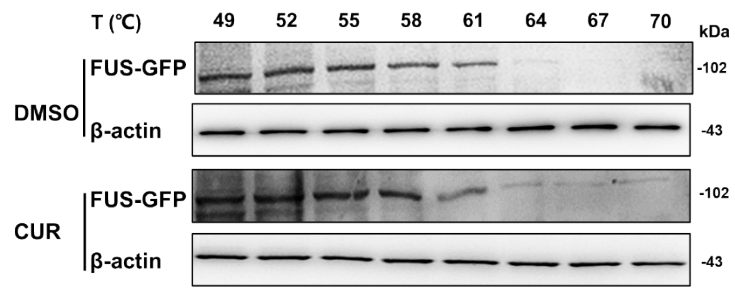

Fig S3. Cellular thermal shift assay results with curcumin treatment.

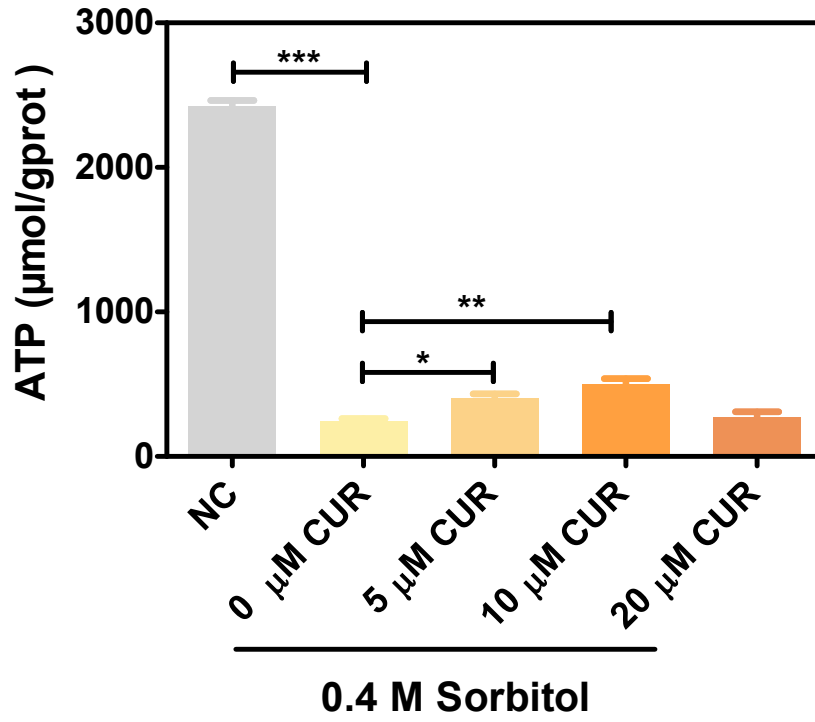

Fig S4. Increased ATP in CUR group. The values were illustrated as the mean  $\pm$  SD. \*  $P < 0.05$ , \*\*  $P < 0.01$ .

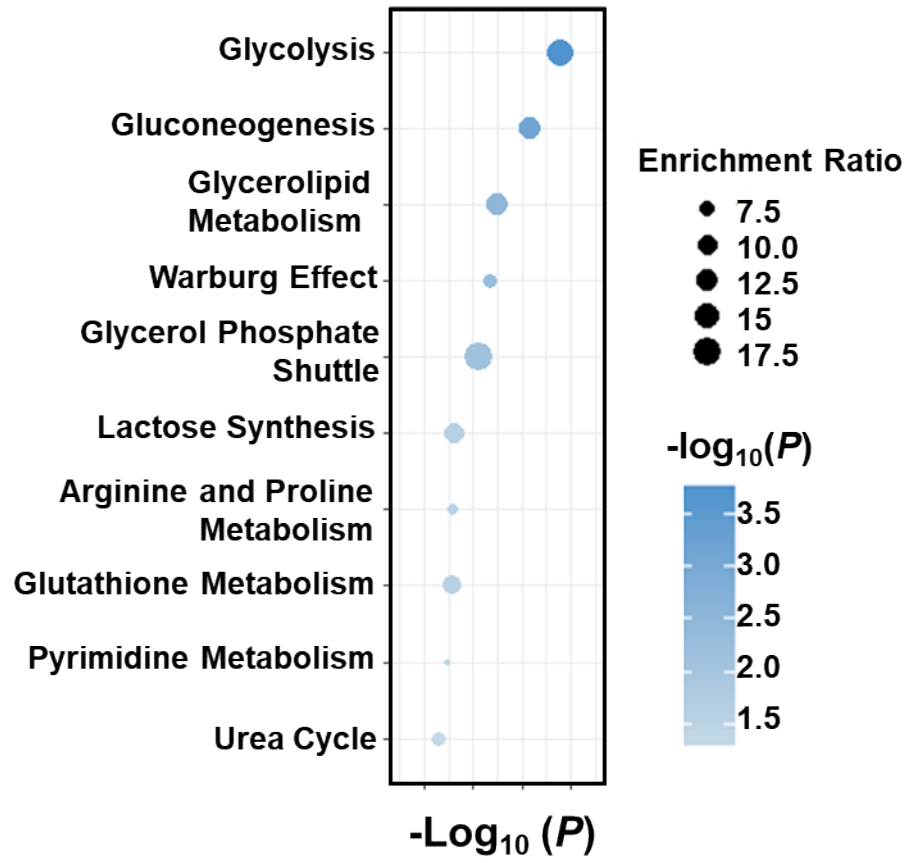

Fig S5. Pathway enrichment of Sorbitol and NC group.



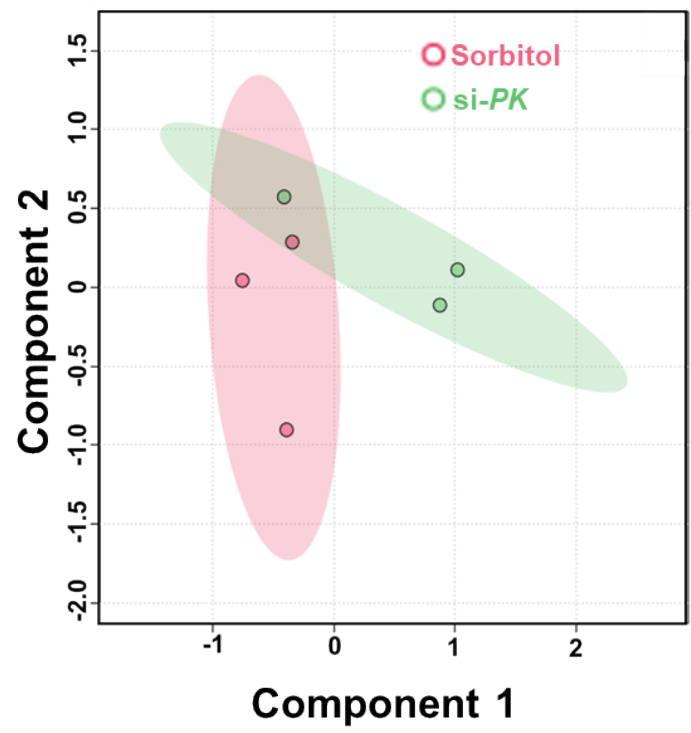

Fig S6. PCA-2D score plot of Sorbitol and si-PK group. PCA: principal component analysis

|                | FUS                | FUS + CUR          |
|----------------|--------------------|--------------------|
|                | (10% PEG 8000) (%) | (10% PEG 8000) (%) |
| Helix          | 13.26              | 16.53              |
| $\beta$ -sheet | 28.52              | 26.67              |
| $\beta$ -turn  | 40.27              | 18.40              |
| Random coil    | 13.20              | 38.40              |

Table S1. The percentage of protein secondary structure.

| T(K) | $K_a$ ( $\times 10^4$ M $^{-1}$ ) | N                 | $\Delta H$ ( $\times 10^6$ cal/mol) | $\Delta S$ ( $\times 10^3$ cal/mol/deg) |
|------|-----------------------------------|-------------------|-------------------------------------|-----------------------------------------|
| 310  | $0.04 \pm 0.364$                  | $3.58 \pm 0.0471$ | $2.797 \pm 0.299$                   | 9.04                                    |

Table S2. Binding constant ( $K_a$ ), stoichiometric number (N), entropy ( $\Delta S$ ), and enthalpy ( $\Delta H$ ) parameters for the interaction of curcumin with FUS.
